# Supplementary material for: Synthesis, Crystal Structure, and Biological Activity of a Multidentate Calix[4]arene Ligand Doubly Functionalized by 2-Hydroxybenzeledene-Thiosemicarbazone
Source: PubMed Central journal article supplement (PMC7024204; doi:10.3390/molecules25020370), 2020-01-16
Supplement: molecules-25-00370-s001.pdf [file molecules-25-00370-s001.pdf]

## Supporting Information

### **Thiosemicarbazone appended calix[4]arene in 1, 3-distal configuration: synthesis, crystal structure, transition metal complexes with insights into antimicrobial and anticancer activity**

Ehsan Bahojb Noruzi,<sup>a</sup> Behrouz Shaabani,<sup>\*a</sup> Silvano Geremia,<sup>b</sup> Neal Hickey,<sup>b</sup> Patrizia Nitti,<sup>b</sup> Hossein Samadi Kafil<sup>c</sup>

<sup>a</sup> Faculty of Chemistry, Department of Inorganic Chemistry, University of Tabriz, Tabriz, Iran

<sup>b</sup> Department of Chemical and Pharmaceutical Sciences, University of Trieste, Trieste, Italy

<sup>c</sup> Drug Applied Research Center, Tabriz University of Medical Sciences, Tabriz, Iran.

## FT-IR Spectra of L and L-Co, L-Ni, L-Cu, L-Zn derivatives

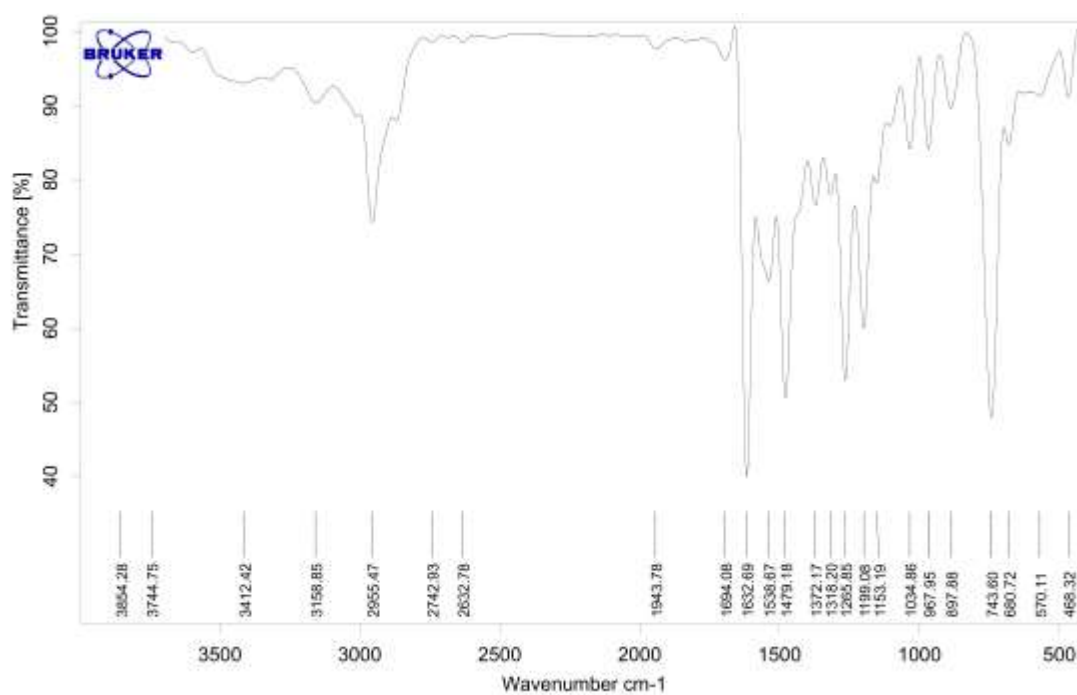

Figure S1: FT-IR spectrum of L (KBr pellet).

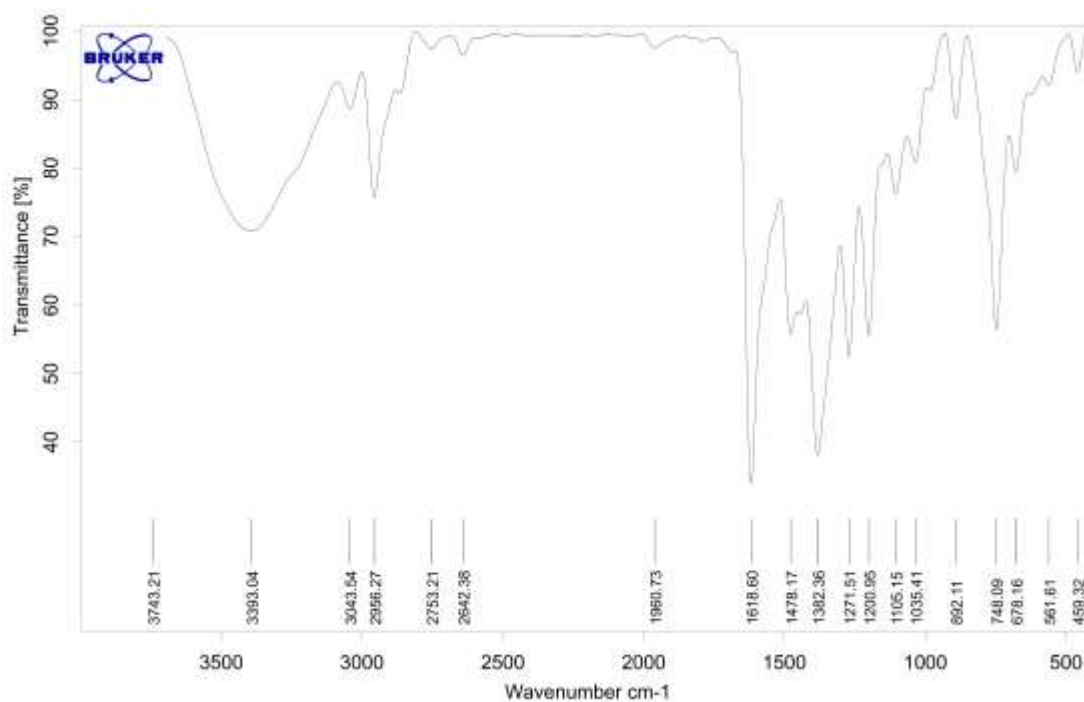

Figure S2: FT-IR spectrum of L-Co derivative (KBr pellet).

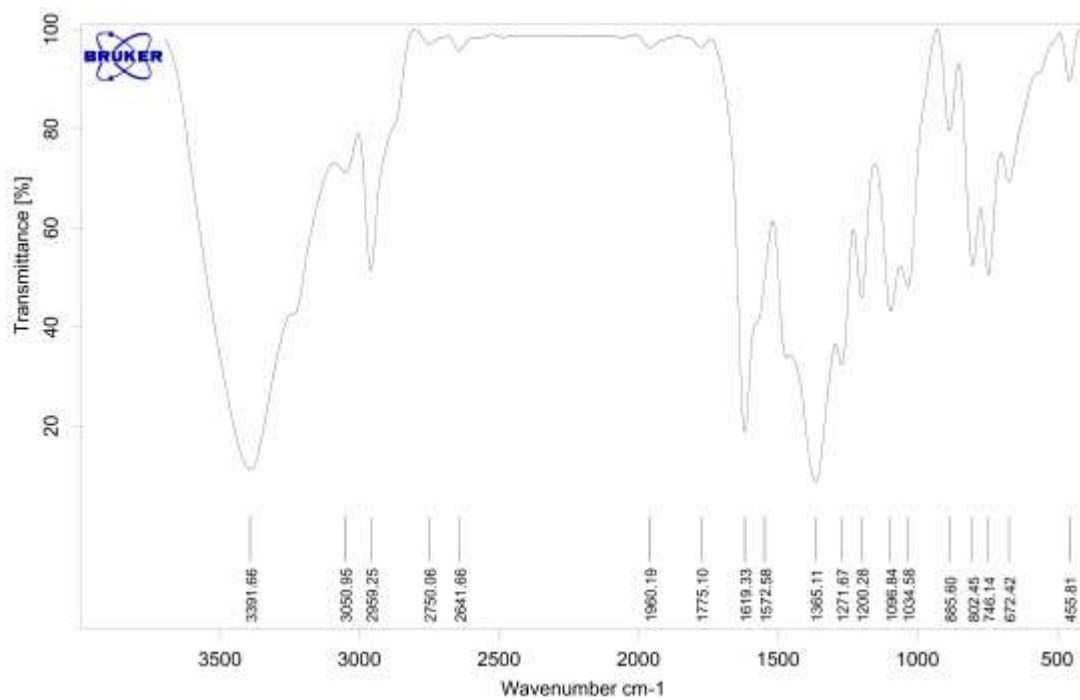

**Figure S3:** FT-IR spectrum of L-Ni derivative (KBr pellet).

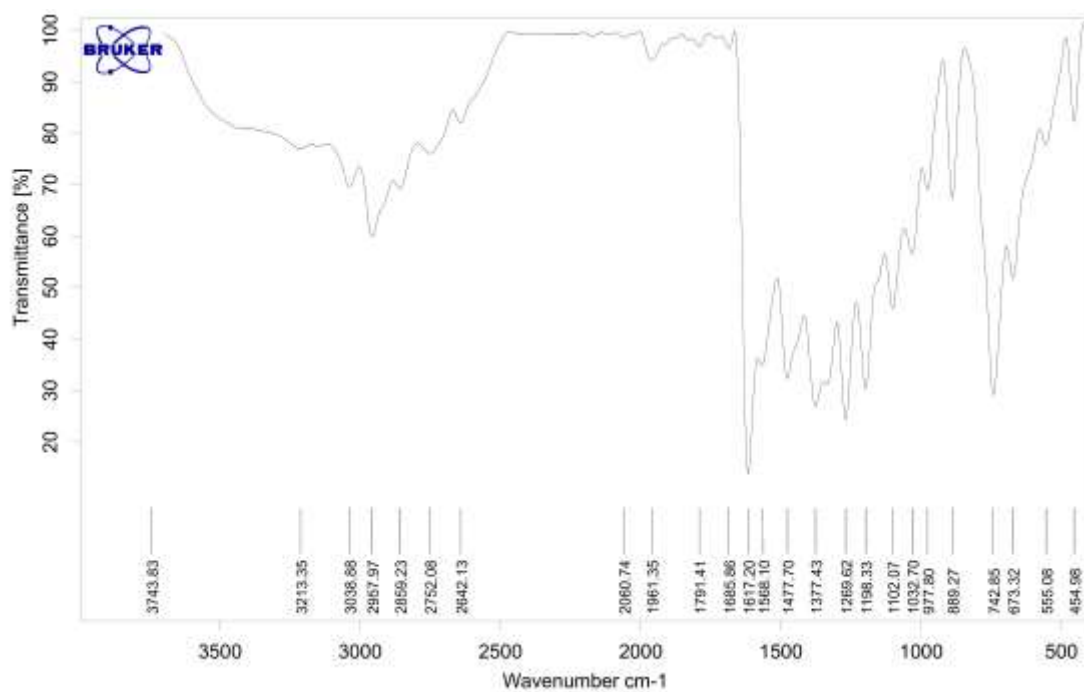

**Figure S4:** FT-IR spectrum of L-Cu derivative (KBr pellet).

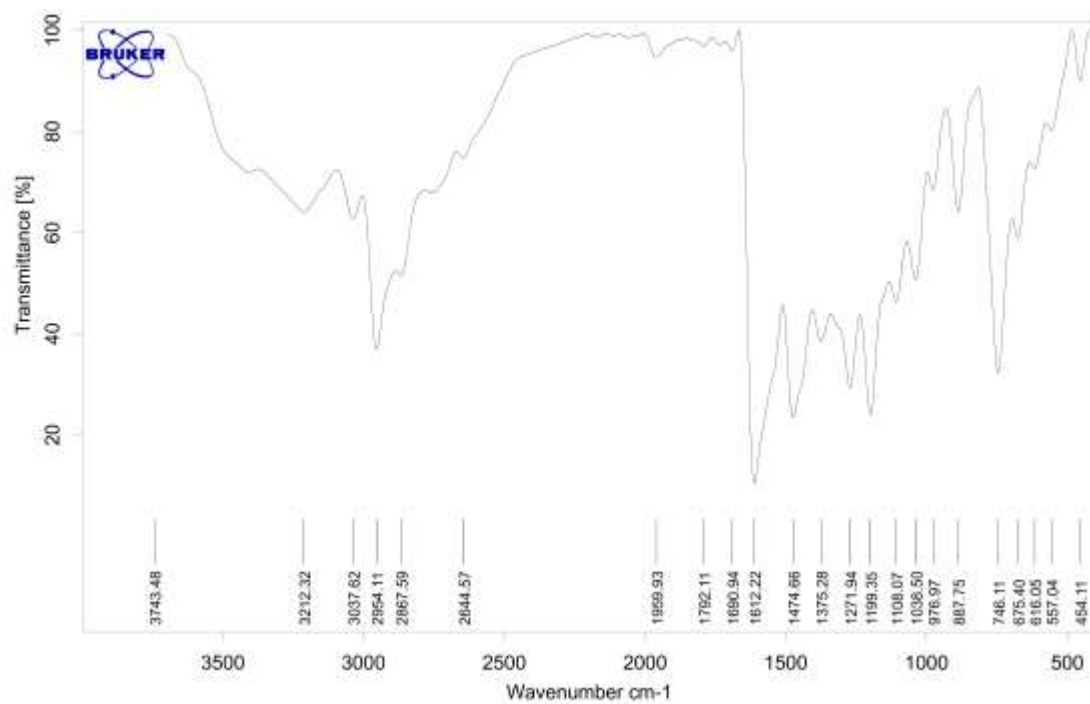

**Figure S5:** FT-IR spectrum of **L-Zn** derivative (KBr pellet).

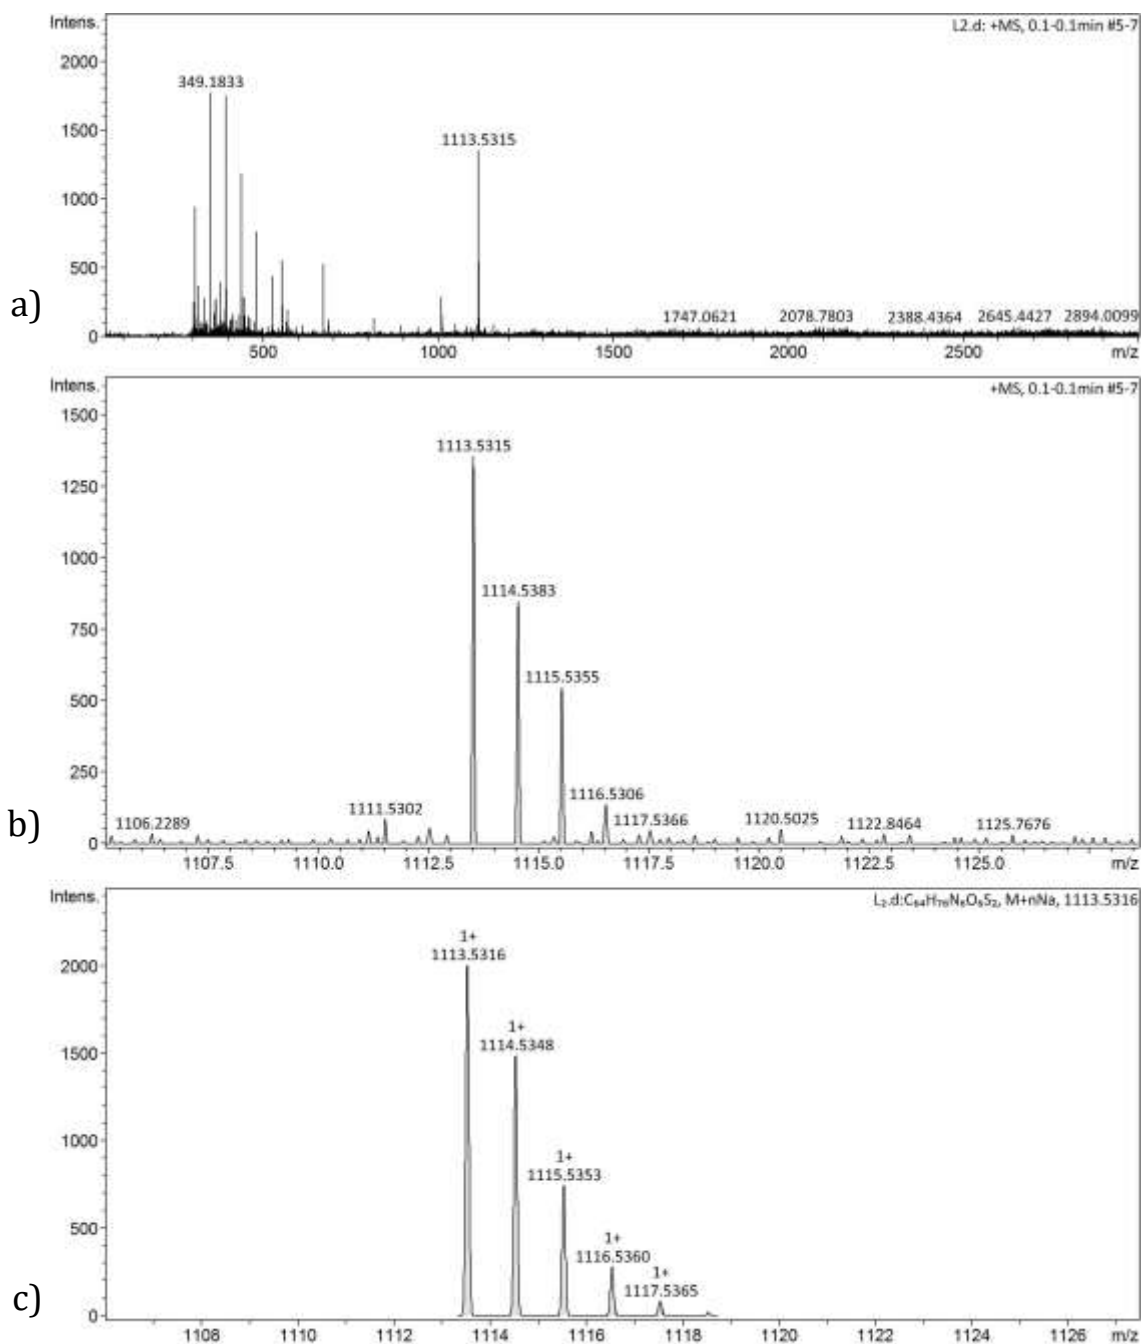

**Figure S6:** a) Positive-ion ESI High Resolution Mass Spectra (HRMS) of **L**. Observed (b) and calculated (c) isotopic distributions for  $\text{LNa}^+$ ,  $[\text{C}_{64}\text{H}_{78}\text{N}_6\text{O}_6\text{S}_2\text{Na}]^+$ .

## Display Report

|                      |                                   |                  |                          |  |
|----------------------|-----------------------------------|------------------|--------------------------|--|
| <b>Analysis Info</b> |                                   | Acquisition Date | 1/8/2020 10:00:10 AM     |  |
| Analysis Name        | D:\Data\Geremia\08.01.20\CoL2-2.d | Operator         | BDAL@DE                  |  |
| Method               | tune wide pos.08012020.m          | Instrument       | micrOTOF-Q 8228888.00052 |  |
| Sample Name          |                                   |                  |                          |  |
| Comment              |                                   |                  |                          |  |

|                              |          |                       |           |                  |           |
|------------------------------|----------|-----------------------|-----------|------------------|-----------|
| <b>Acquisition Parameter</b> |          |                       |           |                  |           |
| Source Type                  | ESI      | Ion Polarity          | Positive  | Set Nebulizer    | 0.4 Bar   |
| Focus                        | Active   | Set Capillary         | -4500 V   | Set Dry Heater   | 180 °C    |
| Scan Begin                   | 50 m/z   | Set End Plate Offset  | -500 V    | Set Dry Gas      | 4.0 l/min |
| Scan End                     | 3000 m/z | Set Collision Cell RF | 800.0 Vpp | Set Divert Valve | Source    |

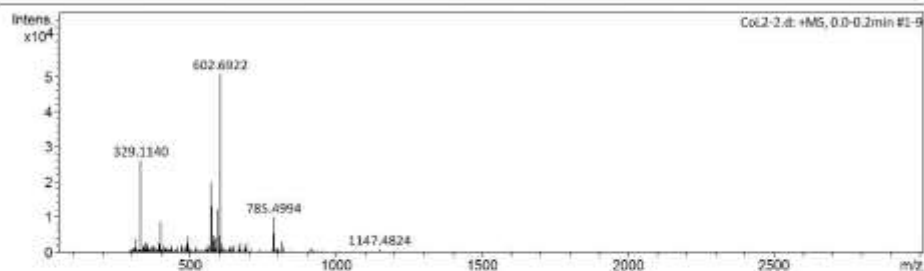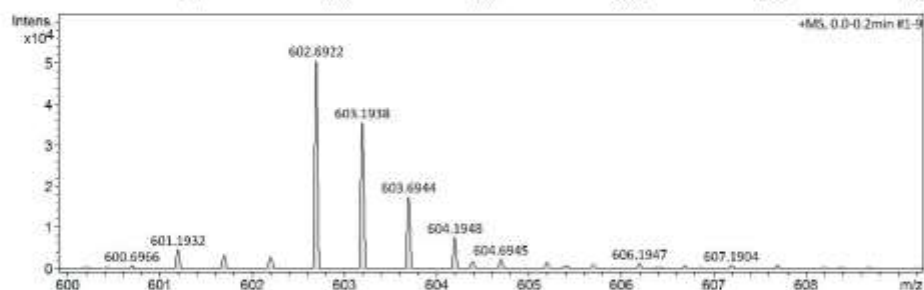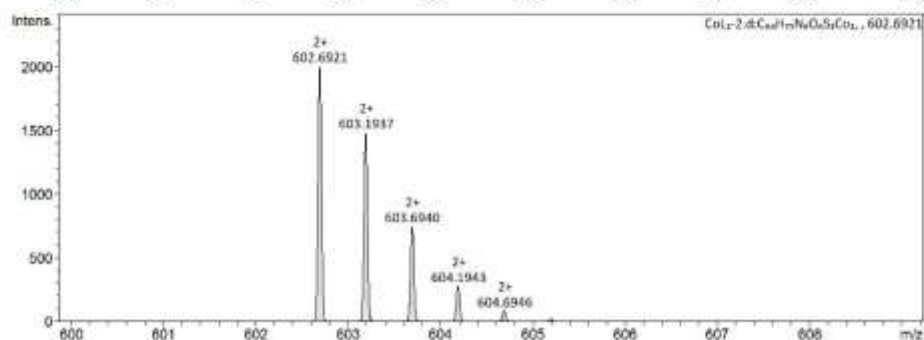

**Figure S7:** Positive-ion ESI High Resolution Mass Spectra (HRMS) of  $\text{Co}^{2+}$  derivative of L. Observed (middle) and calculated (bottom) isotopic distributions for  $\text{LCo(II)Co(III)}^{2+}$ ,  $[\text{C}_{64}\text{H}_{75}\text{N}_6\text{O}_6\text{S}_2\text{Co}_2]^{2+}$ .

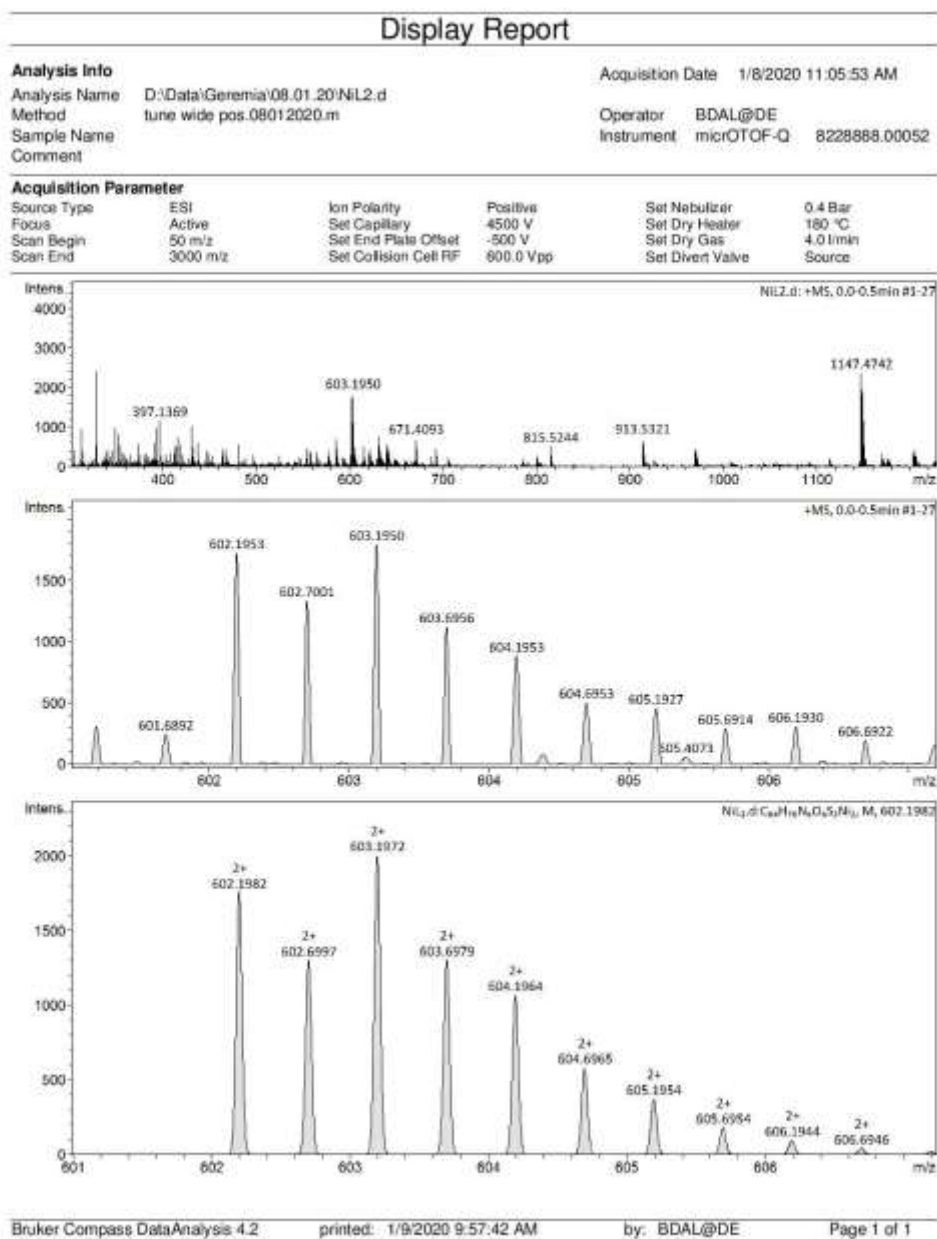

**Figure S8:** a) Positive-ion ESI High Resolution Mass Spectra (HRMS) of Ni<sup>2+</sup> derivative of L. Observed (middle) and calculated (bottom) isotopic distributions for LNi(II)<sub>2</sub><sup>2+</sup>, [C<sub>64</sub>H<sub>76</sub>N<sub>6</sub>O<sub>6</sub>S<sub>2</sub>Ni<sub>2</sub>]<sup>2+</sup>.

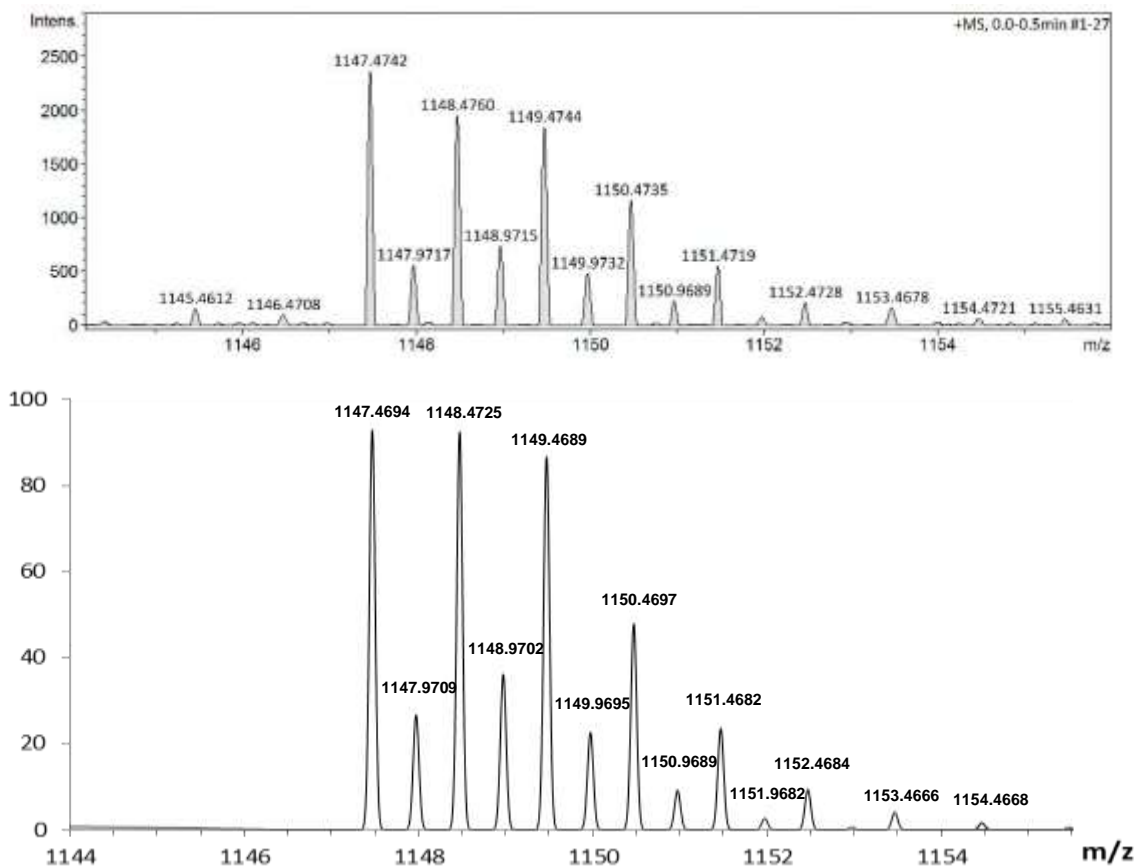

**Figure S9:** Observed (top) and calculated (bottom) isotopic distributions for a mixture containing 0.75  $\text{LNi(II)}^+$ ,  $[\text{C}_{64}\text{H}_{77}\text{N}_6\text{O}_6\text{S}_2\text{Ni}]^+$  and 0.25  $\text{L}_2\text{Ni(II)}_2^{2+}$ ,  $[\text{C}_{128}\text{H}_{154}\text{N}_{12}\text{O}_{12}\text{S}_4\text{Ni}_2]^{2+}$ . Masses were calculated by enviPat Web 2.2 (<http://www.envipat.eawag.ch/index.php>).



## Display Report

|                      |                                   |                  |                          |  |
|----------------------|-----------------------------------|------------------|--------------------------|--|
| <b>Analysis Info</b> |                                   | Acquisition Date | 1/8/2020 11:23:34 AM     |  |
| Analysis Name        | D:\Data\Geremia\08.01.20\CuL2-3.d | Operator         | BDAL@DE                  |  |
| Method               | tune wide pos.08012020.m          | Instrument       | micrOTOF-Q 8228888.00052 |  |
| Sample Name          |                                   |                  |                          |  |
| Comment              |                                   |                  |                          |  |

|                              |          |                       |           |                  |           |
|------------------------------|----------|-----------------------|-----------|------------------|-----------|
| <b>Acquisition Parameter</b> |          |                       |           |                  |           |
| Source Type                  | ESI      | Ion Polarity          | Positive  | Set Nebulizer    | 0.4 Bar   |
| Focus                        | Active   | Set Capillary         | -4500 V   | Set Dry Heater   | 180 °C    |
| Scan Begin                   | 50 m/z   | Set End Plate Offset  | -500 V    | Set Dry Gas      | 4.0 l/min |
| Scan End                     | 3000 m/z | Set Collision Cell RF | 900.0 Vpp | Set Divert Valve | Source    |

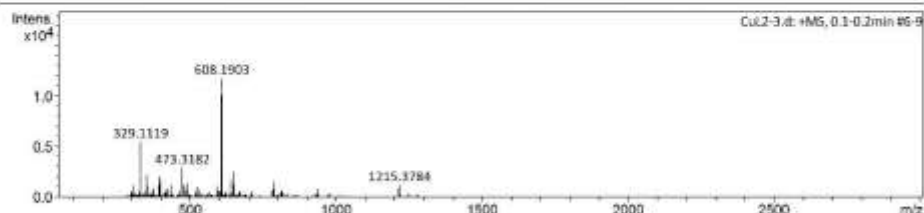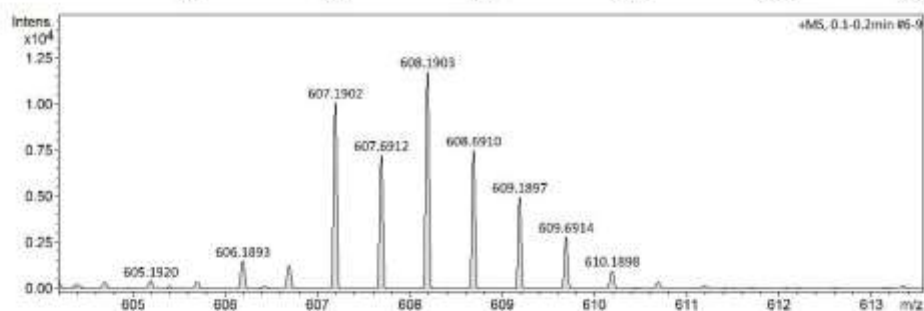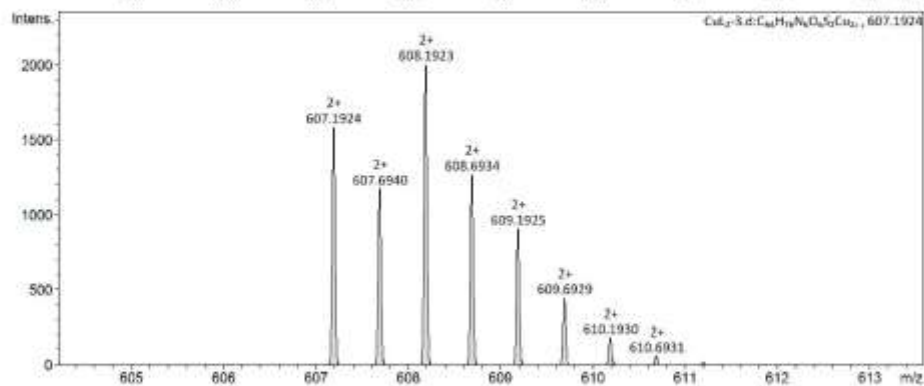

Bruker Compass DataAnalysis 4.2      printed: 1/8/2020 1:25:10 PM      by: BDAL@DE      Page 1 of 1

**Figure S10:** Positive-ion ESI High Resolution Mass Spectra (HRMS) of  $\text{Cu}^{2+}$  derivative of L. Observed (middle) and calculated (bottom) isotopic distributions for  $\text{LCu(II)}_2^{2+}$ ,  $[\text{C}_{64}\text{H}_{76}\text{N}_6\text{O}_6\text{S}_2\text{Cu}_2]^{2+}$ .

## Display Report

| Analysis Info         |                                 | Acquisition Date      |                          |
|-----------------------|---------------------------------|-----------------------|--------------------------|
| Analysis Name         | D:\Data\Geremia\08.01.20\ZnL2.d | 1/8/2020 10:50:18 AM  |                          |
| Method                | tune wide pos.08012020.m        | Operator              | BDAL@DE                  |
| Sample Name           |                                 | Instrument            | micrOTOF-Q 8228888.00052 |
| Comment               |                                 |                       |                          |
| Acquisition Parameter |                                 |                       |                          |
| Source Type           | ESI                             | Ion Polarity          | Positive                 |
| Focus                 | Active                          | Set Capillary         | -4500 V                  |
| Scan Begin            | 50 m/z                          | Set End Plate Offset  | -500 V                   |
| Scan End              | 3000 m/z                        | Set Collision Cell RF | 800.0 Vpp                |
|                       |                                 | Set Nebulizer         | 0.4 Bar                  |
|                       |                                 | Set Dry Heater        | 180 °C                   |
|                       |                                 | Set Dry Gas           | 4.0 l/min                |
|                       |                                 | Set Divert Valve      | Source                   |

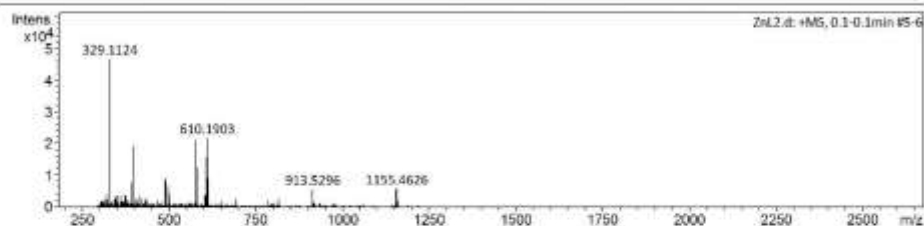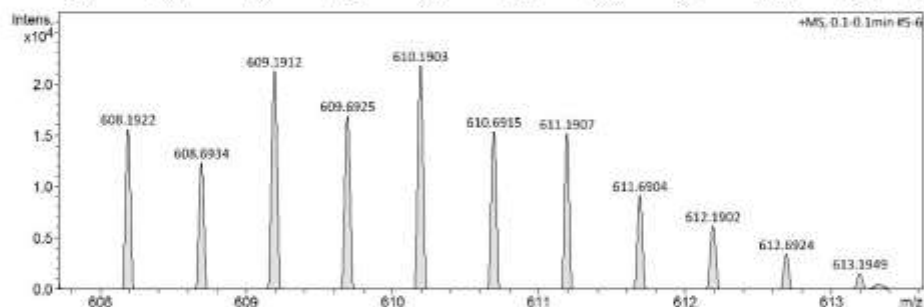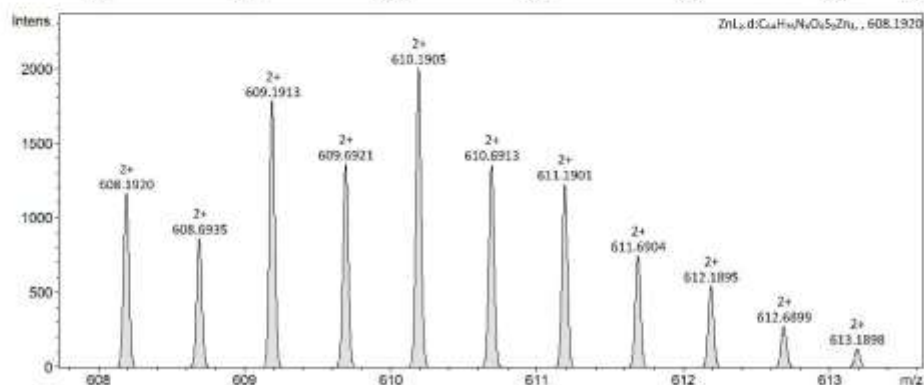

**Figure S11:** Positive-ion ESI High Resolution Mass Spectra (HRMS) of  $\text{Zn}^{2+}$  derivative of L. Observed (middle) and calculated (bottom) isotopic distributions for  $\text{LZn(II)}_2^{2+}$ ,  $[\text{C}_{64}\text{H}_{76}\text{N}_6\text{O}_6\text{S}_2\text{Zn}_2]^{2+}$ .

**Table S1.** IR spectral data (cm<sup>-1</sup>) of the ligand and its corresponding metal derivatives in KBr pellets.

| Vibrational mode | Frequency in (cm <sup>-1</sup> ) |                   |                   |                   |                   |
|------------------|----------------------------------|-------------------|-------------------|-------------------|-------------------|
|                  | L                                | LCo <sup>2+</sup> | LNi <sup>2+</sup> | LCu <sup>2+</sup> | LZn <sup>2+</sup> |
| C=N              | 1633                             | 1618              | 1619              | 1617              | 1612              |
| N-C=S            | 1539                             | shoulder          | 1572              | 1568              | shoulder          |
| C=S              | 898                              | 892               | 885               | 889               | 887               |

**Table S2.** Crystal data and structure refinement for compound L.

| Ligand L                                   |                                                                                                                                         |
|--------------------------------------------|-----------------------------------------------------------------------------------------------------------------------------------------|
| Empirical formula                          | (C <sub>64</sub> H <sub>78</sub> N <sub>6</sub> O <sub>6</sub> S <sub>2</sub> ), H <sub>2</sub> O                                       |
| Formula weight                             | 1109.46                                                                                                                                 |
| Temperature (K)                            | 100(2)                                                                                                                                  |
| Wavelength (Å)                             | 0.7                                                                                                                                     |
| Crystal system                             | Triclinic                                                                                                                               |
| Space group                                | <i>P</i> -1                                                                                                                             |
| Unit cell dimensions (Å, °)                | <i>a</i> = 12.690(6), <i>α</i> = 104.44(4)<br><i>b</i> = 15.344(18), <i>β</i> = 98.01(4)<br><i>c</i> = 19.15(3), <i>γ</i> = 104.016(10) |
| Volume (Å <sup>3</sup> )                   | 3423(6)                                                                                                                                 |
| <i>Z</i>                                   | 2                                                                                                                                       |
| $\rho_{\text{calcd}}$ (g/cm <sup>3</sup> ) | 1.076                                                                                                                                   |
| $\mu$ (mm <sup>-1</sup> )                  | 0.122                                                                                                                                   |
| F(000)                                     | 1188                                                                                                                                    |
| Reflections collected                      | 23853                                                                                                                                   |
| Independent reflections                    | 6918 [R(int) = 0.1328]                                                                                                                  |
| Data / restraints / parameters             | 6918 / 3 / 734                                                                                                                          |
| GooF                                       | 0.972                                                                                                                                   |
| Final <i>R</i> indices [I>2σ(I)]           | <i>R</i> <sub>1</sub> = 0.0683, <i>wR</i> <sub>2</sub> = 0.1677                                                                         |
| <i>R</i> indices (all data)                | <i>R</i> <sub>1</sub> = 0.1359, <i>wR</i> <sub>2</sub> = 0.2108                                                                         |
| CCDC code                                  | 1944727                                                                                                                                 |

**Table S3:** Elemental analysis of the metal derivatives of **L**

| L                                                    |                                                                                  |                            |            |
|------------------------------------------------------|----------------------------------------------------------------------------------|----------------------------|------------|
|                                                      |                                                                                  |                            |            |
| Metal salt                                           | Proposed structure                                                               | Elemental analysis         |            |
| Co(NO <sub>3</sub> ) <sub>2</sub> ·6H <sub>2</sub> O | [CoL](NO <sub>3</sub> ) <sub>2</sub> ·2H <sub>2</sub> O                          | C, 58.66; H, 6.31; N, 8.55 | Calculated |
|                                                      | C <sub>64</sub> H <sub>82</sub> N <sub>8</sub> O <sub>14</sub> S <sub>2</sub> Co | C, 58.76; H, 5.97; N, 8.43 | Found      |
| Ni(NO <sub>3</sub> ) <sub>2</sub> ·6H <sub>2</sub> O | [NiL](NO <sub>3</sub> ) <sub>2</sub>                                             | C, 60.33; H, 6.17; N, 8.79 | Calculated |
|                                                      | C <sub>64</sub> H <sub>78</sub> N <sub>8</sub> O <sub>12</sub> S <sub>2</sub> Ni | C, 60.32; H, 5.95; N, 8.99 | Found      |
| Cu(NO <sub>3</sub> ) <sub>2</sub> ·2H <sub>2</sub> O | [CuL](NO <sub>3</sub> ) <sub>2</sub>                                             | C, 60.10; H, 6.15; N, 8.76 | Calculated |
|                                                      | C <sub>64</sub> H <sub>78</sub> N <sub>8</sub> O <sub>12</sub> S <sub>2</sub> Cu | C, 59.72; H, 5.98; N, 8.66 | Found      |
| Zn(NO <sub>3</sub> ) <sub>2</sub> ·4H <sub>2</sub> O | [ZnL](NO <sub>3</sub> ) <sub>2</sub>                                             | C, 60.01; H, 6.14; N, 8.75 | Calculated |
|                                                      | C <sub>64</sub> H <sub>78</sub> N <sub>8</sub> O <sub>12</sub> S <sub>2</sub> Zn | C, 60.23; H, 6.01; N, 8.64 | Found      |
